# Supplementary material for: Bacterial cellulose-derived micro/mesoporous carbon anode materials controlled by poly(methyl methacrylate) for fast sodium ion transport
Source: Royal Society of Chemistry journal article supplement (doi:10.1039/d1nr07879h), 2022-01-01
Supplement: d1nr07879h1.pdf [file d1nr07879h1.pdf]

*Supporting Information*

**Bacterial Cellulose-Derived Micro/mesoporous Carbon Anode Materials  
Controlled by Poly (methyl methacrylate) for Fast Sodium Ion Transport**

Fujuan Wang <sup>a</sup>, Xiaohong Shi <sup>a</sup>, Junlei Zhang <sup>b,c</sup>, Tianqi He <sup>b,c</sup>, Liang Yang <sup>a</sup>, Tianyun  
Zhang <sup>a,b,\*</sup>, Fen Ran <sup>b,c,\*</sup>

<sup>a</sup> *School of Mechanical and Electrical Engineering, Lanzhou University of Technology,  
Lanzhou 730050, China*

<sup>b</sup> *State Key Laboratory of Advanced Processing and Recycling of Non-ferrous Metals, Lanzhou  
University of Technology, Lanzhou 730050, China*

<sup>c</sup> *School of Materials Science and Engineering, Lanzhou University of Technology, Lanzhou  
730050, China*

\* *Corresponding authors: Dr. Tianyun Zhang (E-mail: zhangtianyunt@163.com or  
zhangtianyun@lut.edu.cn); and Prof. Fen Ran (E-mail: ranfen@163.com or ranfen@lut.edu.cn)*

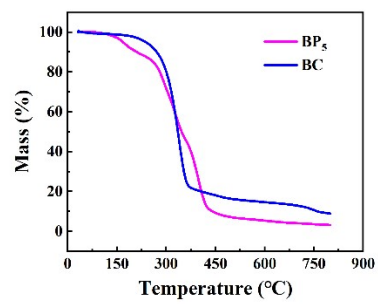

**Figure S1** TGA curves of the BP<sub>5</sub> and pure BC.

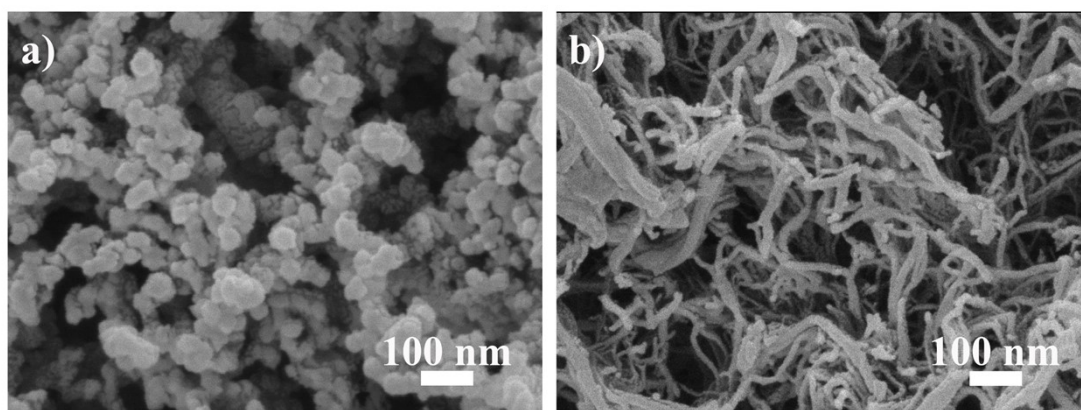

**Figure S2** SEM images for a) *c-BC-1050* and b) *c-BP<sub>5</sub>-1050*.

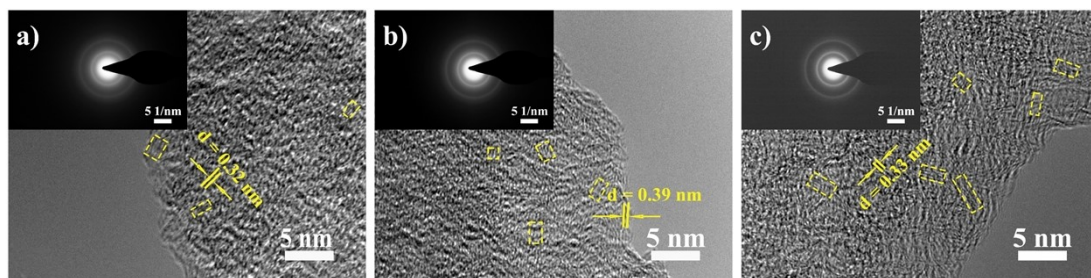

**Figure S3** TEM images for a) *c*-BP<sub>5</sub>-850, b) *c*-BP<sub>5</sub>-1050, and c) *c*-BP<sub>5</sub>-1250.

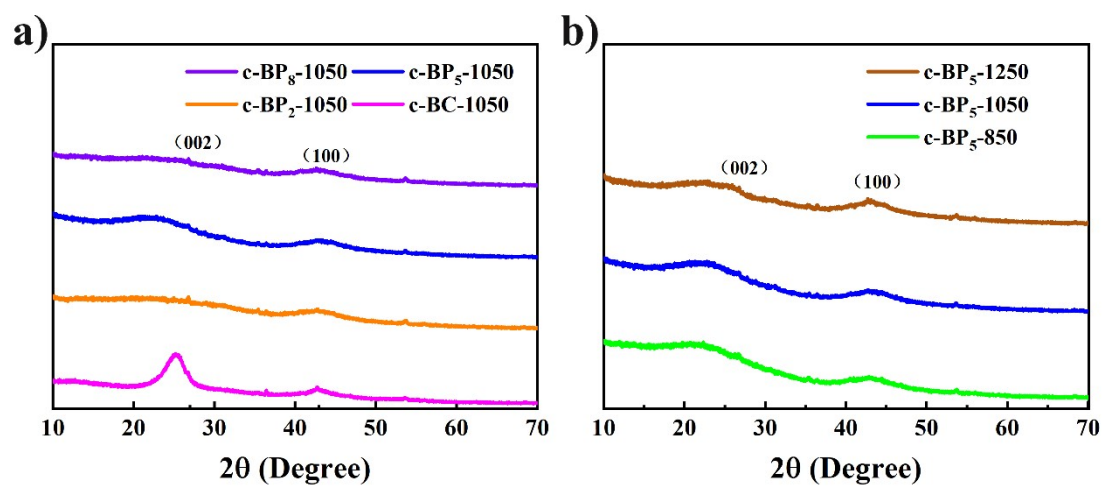

**Figure S4** a) XRD patterns for  $c\text{-BC-1050}$ ,  $c\text{-BP}_2\text{-1050}$ ,  $c\text{-BP}_5\text{-1050}$ , and  $c\text{-BP}_8\text{-1050}$ ; b) XRD patterns for  $c\text{-BP}_5\text{-850}$ ,  $c\text{-BP}_5\text{-1050}$ , and  $c\text{-BP}_5\text{-1250}$ .

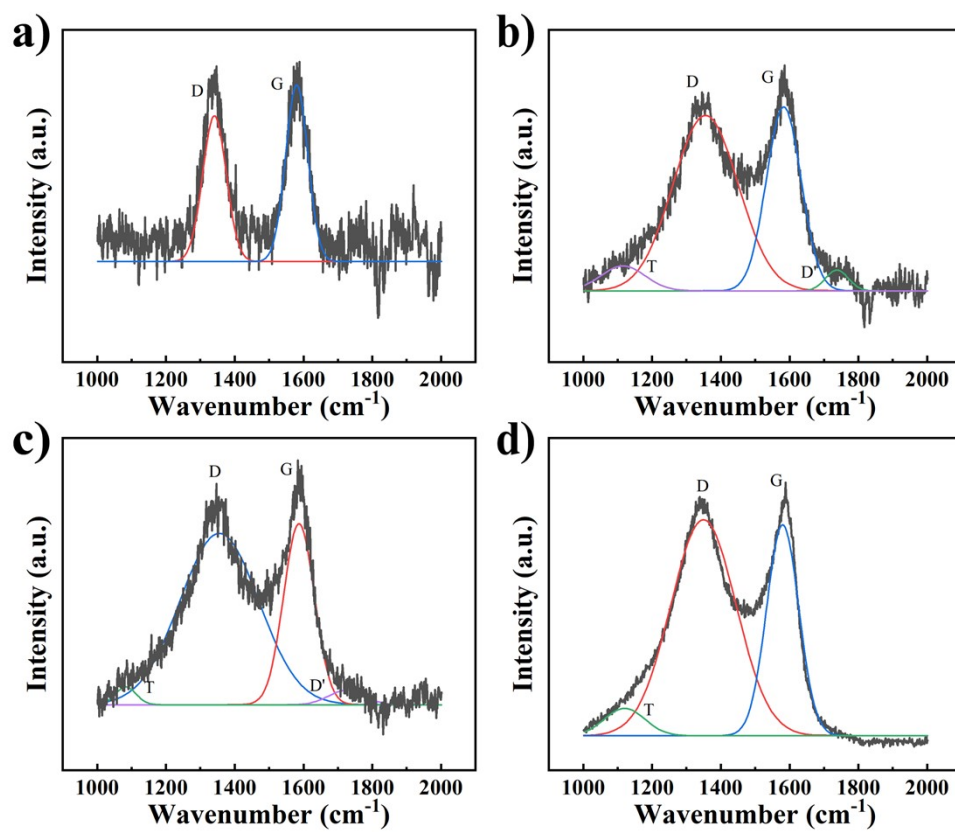

**Figure S5** Raman patterns with fitted curves for a) c-BC-1050, b) c-BP<sub>2</sub>-1050, c) c-BP<sub>5</sub>-1050, and d) c-BP<sub>8</sub>-1050.

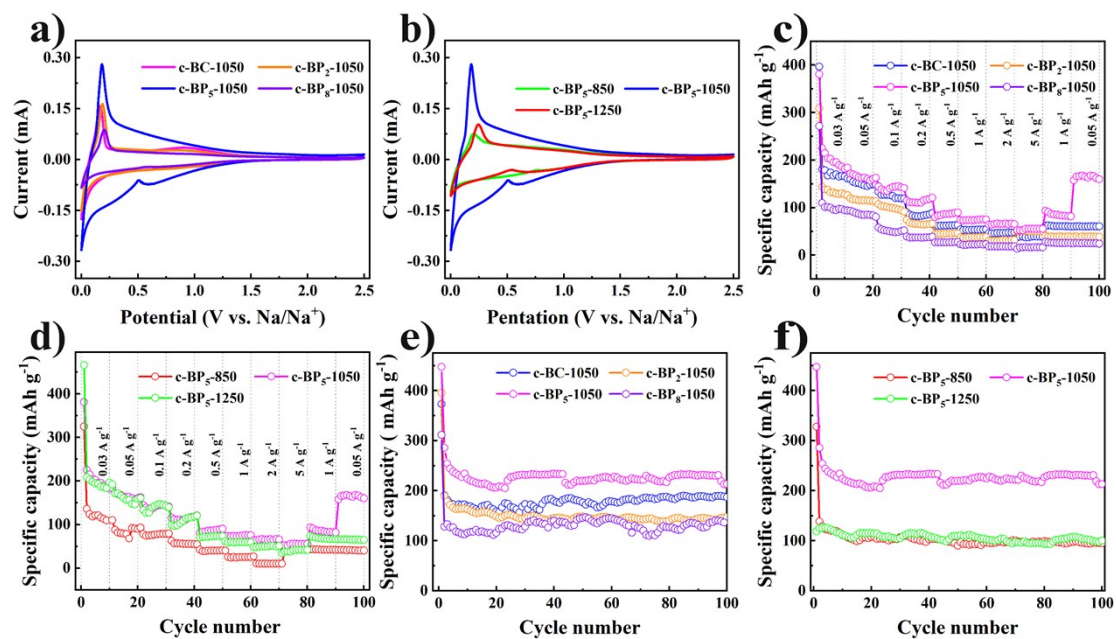

**Figure S6** The electrochemical performance of different carbon anodes: a) and b) for the CV curves at  $0.1 \text{ mV s}^{-1}$ ; c) and d) for the rate performance; e) and f) for the cycle performance at  $0.1 \text{ A g}^{-1}$ .

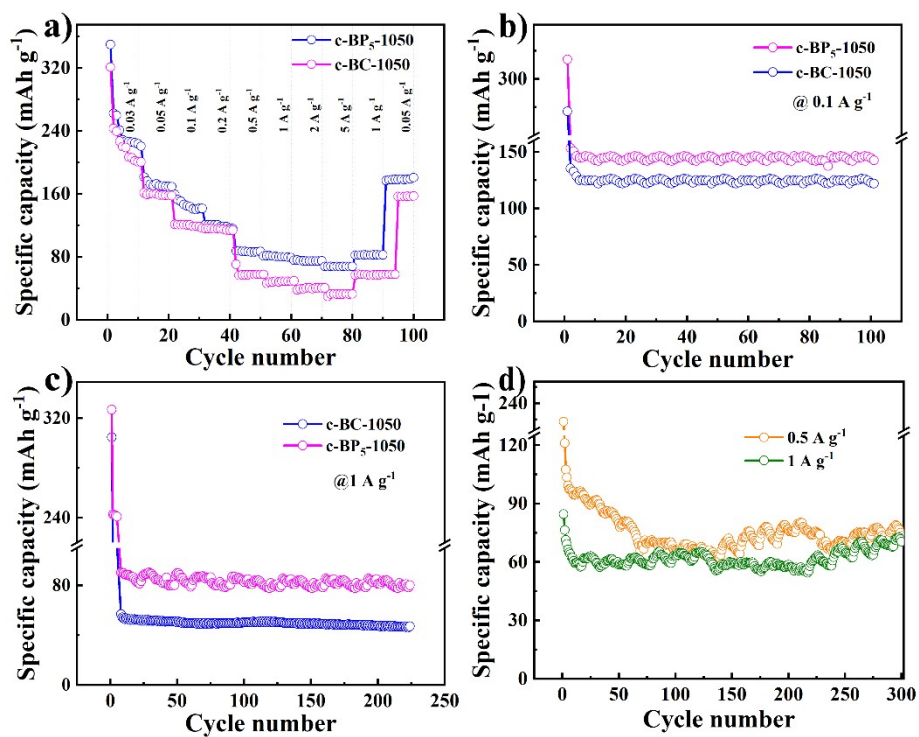

**Figure S7** The electrochemical performance of *c*-BP<sub>5</sub>-1050 and *c*-BC-1050 with areal loading of 1.3-1.5 mg cm<sup>-2</sup>: a) rate performance; b) cycle stability at 0.1 A g<sup>-1</sup>, and c) 1 A g<sup>-1</sup>; d) the cycle performance of *c*-BP<sub>5</sub>-1050 with areal loading of 0.8 mg cm<sup>-2</sup> at 0.5 A g<sup>-1</sup> and 1 A g<sup>-1</sup> for 300 cycles.



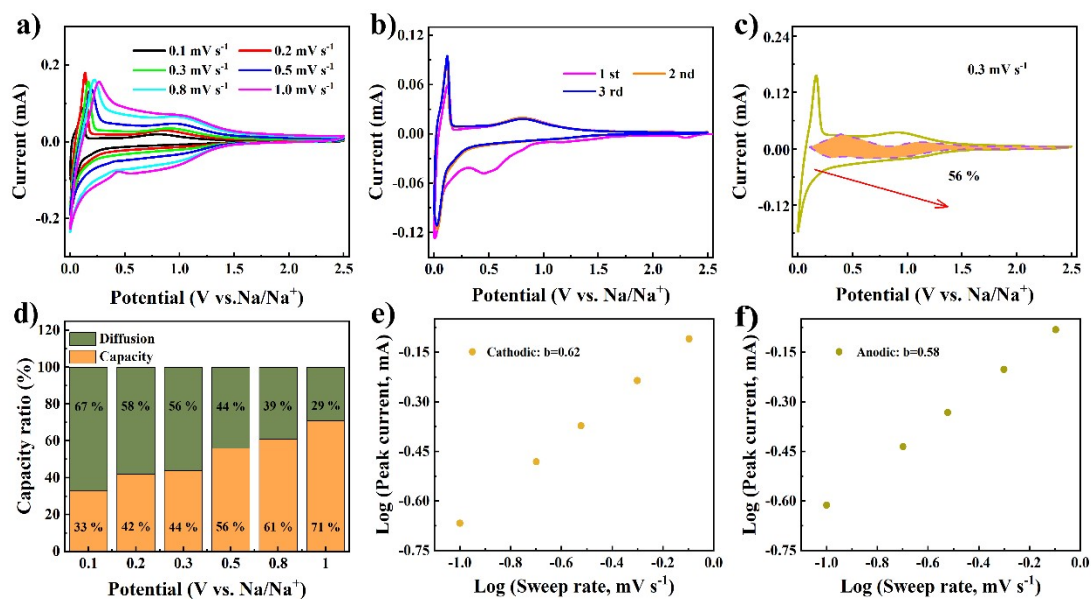

**Figure S8** a) CV curves at scan rates from 0.1 to 1.0  $\text{mV s}^{-1}$  for c-BC-1050 carbon anode; b) CV curves of c-BC-1050 carbon anode at a scan rate of 0.1  $\text{mV s}^{-1}$ ; c) the capacitive contribution of c-BC-1050 at 0.3  $\text{mV s}^{-1}$ ; d) the capacity ratio of capacitive- and diffusion-controlled charge versus from 0.1 to 1  $\text{mV s}^{-1}$  for c-BC-1050; and e) cathodic and f) anodic of the relationship between peak current and scan rate.

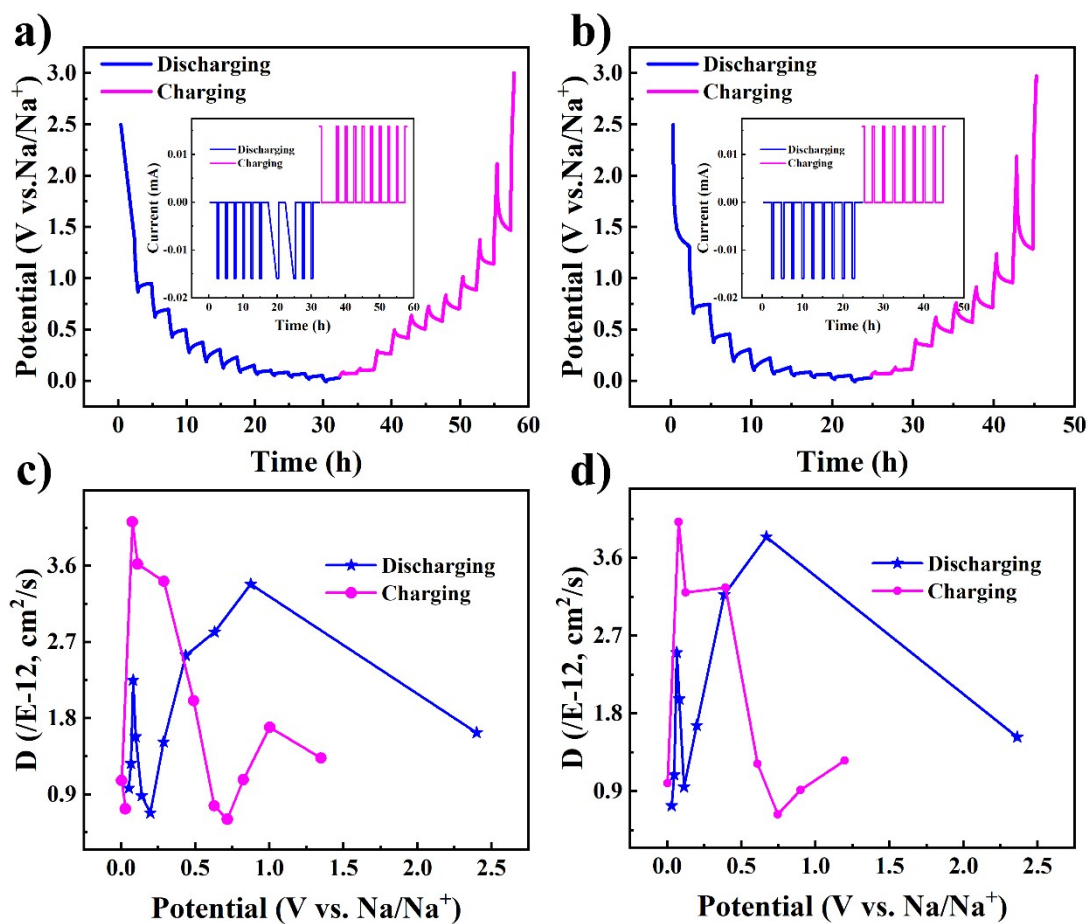

**Figure S9** GITT measurements. The potential profiles of a) *c*-BP<sub>2</sub>-1050 and c) *c*-BP<sub>8</sub>-1050 anodes at the discharging/charging states (inset images are the relationship of current and time); the calculating sodium-ion diffusion coefficient for b) *c*-BP<sub>2</sub>-1050 and d) *c*-BP<sub>8</sub>-1050 anodes at the discharging/charging states.

**Table S1** Parameters of different carbon materials.

| Sample                  | Peak position(° ) |        | $d_{002}(\text{nm})$ | $L_c$ (nm) | $I_D/I_G$ |
|-------------------------|-------------------|--------|----------------------|------------|-----------|
|                         | (002)             | (100)  |                      |            |           |
| c-BC-1050               | 25.634            | 42.694 | 0.347                | 0.136      | 1.264     |
| c-BP <sub>2</sub> -1050 | 23.558            | 42.749 | 0.377                | 2.000      | 1.784     |
| c-BP <sub>8</sub> -1050 | 26.788            | 42.567 | 0.332                | 0.708      | 2.389     |
| c-BP <sub>5</sub> -1050 | 22.964            | 43.113 | 0.387                | 0.622      | 2.069     |
| c-BP <sub>5</sub> -850  | 26.967            | 43.192 | 0.330                | 1.985      | -         |
| c-BP <sub>5</sub> -1250 | 25.899            | 42.749 | 0.344                | 0.515      | -         |

Peak positions of (002) and (100), the average interlayer spacing  $d_{002}$ , the average thickness ( $L_c$ ), and the number ( $N$ ) of the stacked graphene sheets in resulting carbons from XRD patterns. The  $d_{002}$  could be conducted according to Bragg's equation:  $d_{002}$  (nm) =  $\lambda/2\sin\theta$ , where  $2\theta$  is the diffraction angle,  $\lambda$  is the wavelength of the incident X-ray excitation beam ( $\lambda=0.154$  nm). The  $L_c$  of the order-layered segments is estimated by the Debye-Scherrer equation.  $L_c=0.89\lambda/\beta_{002}\cos\theta_{002}$ , in which  $\theta_{002}$  and  $\beta_{002}$  represent the (002) peak position and peak width at its half height, respectively. The number  $N$  is calculated by  $L_c/d_{002}$ .

**Table S2** The physical parameters and electrochemical performance comparison of various carbon anodes recently reported using cellulose as precursors for SIB.

| Sample                          | S <sub>BET</sub> (m <sup>2</sup> g <sup>-1</sup> )<br>1) | I <sub>D</sub> /I <sub>G</sub> | Areal Load<br>(mg cm <sup>-2</sup> ) | Rate performance                      |                                 | Reference            |
|---------------------------------|----------------------------------------------------------|--------------------------------|--------------------------------------|---------------------------------------|---------------------------------|----------------------|
|                                 |                                                          |                                |                                      | Current density (mA g <sup>-1</sup> ) | Capacity (mAh g <sup>-1</sup> ) |                      |
| Natural cotton                  | 38                                                       | -                              | 2.5-3.5                              | 150                                   | 275                             | [1]                  |
|                                 |                                                          |                                |                                      | 300                                   | 180                             |                      |
| Bleached pulp                   | 377                                                      | 1.05                           | 1-1.2                                | 2000                                  | 85                              | [2]                  |
| TEMPO- bleached<br>pulp         | 126                                                      | -                              | 2.5                                  | 100                                   | 196                             | [3]                  |
| cellulose nanocrystals<br>films | 145.56                                                   | 1.07                           | 2                                    | 20                                    | 375                             | [4]                  |
|                                 |                                                          |                                |                                      | 200                                   | 220                             |                      |
| Bacterial cellulose<br>films    | 128                                                      | 1.90                           | 0.5                                  | 200                                   | 271                             | [5]                  |
|                                 |                                                          |                                |                                      | 200                                   | 205                             |                      |
| Hard carbon                     | -                                                        | -                              | 1.5                                  | 50                                    | 310                             | [6]                  |
|                                 |                                                          |                                |                                      | 5000                                  | 145                             |                      |
| Magnolia grandiflora            | 95.7                                                     | 1.09                           | -                                    | 500                                   | 185.4                           | [7]                  |
| Lima leaves                     |                                                          |                                |                                      | 2000                                  | 126.8                           |                      |
| Cellulose                       | 117                                                      | 1.49                           | 2.5                                  | 200                                   | 200                             | [8]                  |
|                                 |                                                          |                                |                                      | 30                                    | 396.6                           |                      |
| c-BC-1050                       | 58.40                                                    | 1.26                           | 0.8                                  | 2000                                  | 46.8                            | <b>This<br/>work</b> |
|                                 |                                                          |                                |                                      | 30                                    | 200.4                           |                      |
|                                 |                                                          |                                |                                      | 2000                                  | 37.9                            |                      |
| c-BP <sub>5</sub> -1050         | 141.03                                                   | 2.07                           | 0.8                                  | 30                                    | 380.7                           | <b>This<br/>work</b> |
|                                 |                                                          |                                |                                      | 2000                                  | 64.1                            |                      |
|                                 |                                                          |                                |                                      | 30                                    | 225.6                           |                      |
|                                 |                                                          |                                | 1.3-1.5                              | 2000                                  | 75.4                            |                      |

## References

- [1] Li Y, Hu Y-S, Titirici M-M, et al. Hard Carbon Microtubes Made from Renewable Cotton as High-Performance Anode Material for Sodium-Ion Batteries[J]. *Advanced Energy Materials*, 2016, 6(18): 1600659.
- [2] Luo W, Schardt J, Bommier C, et al. Carbon Nanofibers Derived from Cellulose Nanofibers as a Long-Life Anode Material for Rechargeable Sodium-Ion Batteries[J]. *Journal of Materials Chemistry A*, 2013, 1(36): 10662-10666.
- [3] Shen F, Zhu H, Luo W, et al. Chemically Crushed Wood Cellulose Fiber Towards High-Performance Sodium-Ion Batteries[J]. *ACS Appl Mater Interfaces*, 2015, 7(41): 23291-23296.
- [4] Zhu H, Shen F, Luo W, et al. Low Temperature Carbonization of Cellulose Nanocrystals for High Performance Carbon Anode of Sodium-Ion Batteries[J]. *Nano Energy*, 2017, 33: 37-44.
- [5] Yang H, Xu R, and Yu Y. A Facile Strategy toward Sodium-Ion Batteries with Ultra-Long Cycle Life and High Initial Coulombic Efficiency: Free-Standing Porous Carbon Nanofiber Film Derived from Bacterial Cellulose[J]. *Energy Storage Materials*, 2019, 22: 105-112.
- [6] Xia J L, Yan D, Guo L P, et al. Hard Carbon Nanosheets with Uniform Ultramicropores and Accessible Functional Groups Showing High Realistic Capacity and Superior Rate Performance for Sodium-Ion Storage[J]. *Advanced Materials*, 2020, 32(21): 2000447.
- [7] Zhu Z, Zhong W, Zhang Y, et al. Elucidating Electrochemical Intercalation Mechanisms of Biomass-Derived Hard Carbon in Sodium-/Potassium-Ion Batteries[J]. *Carbon Energy*, 2021: 1-13.
- [8] Qiu S, Xiao L, Sushko M L, et al. Manipulating Adsorption-Insertion Mechanisms in Nanostructured Carbon Materials for High-Efficiency Sodium Ion Storage[J]. *Advanced Energy Materials*, 2017, 7(17): 1700403.
